# Supplementary material
Source: PubMed Central journal article supplement (PMC3892959)
Supplement: NIHMS534975-supplement-1_si_001.pdf [file NIHMS534975-supplement-1_si_001.pdf]

*Supporting Information*

**Tracking the Emergence of High Affinity Aptamers for rhVEGF<sub>165</sub>  
during CE-SELEX Using High Throughput Sequencing**

Meng Jing and Michael T. Bowser\*

Department of Chemistry, University of Minnesota, 207 Pleasant Street SE, Minneapolis, Minnesota  
55455, United States

Email: [bowser@umn.edu](mailto:bowser@umn.edu)

#### **[1] Motifs of the Short Byproducts**

#### **[2] Gel Image of the PCR Products after Gel Extraction Purification**

#### **[3] Top 100 Abundant Oligonucleotide Fragments from 5 nt through 15 nt in Selected Pools**

#### **[4] Motifs Found in Contigs**

#### **[1] Motifs of the Short Byproducts.**

Motifs of the short byproducts were discovered using MEME4.7.0 online version. The specific sequence lengths at which the short byproducts were the most abundant were first identified. All the sequences at the peak lengths were extracted to form new FASTA files. The primer regions of these sequences were removed before the sequences were uploaded to discover motifs, register position of motifs, and the abundance of the motifs. Since MEME does not allow analysis on sequences shorter than 48 nt, the first 3 nt in reverse primer region were kept for sequences at lengths below 48. The motifs were summarized in Figure S1.

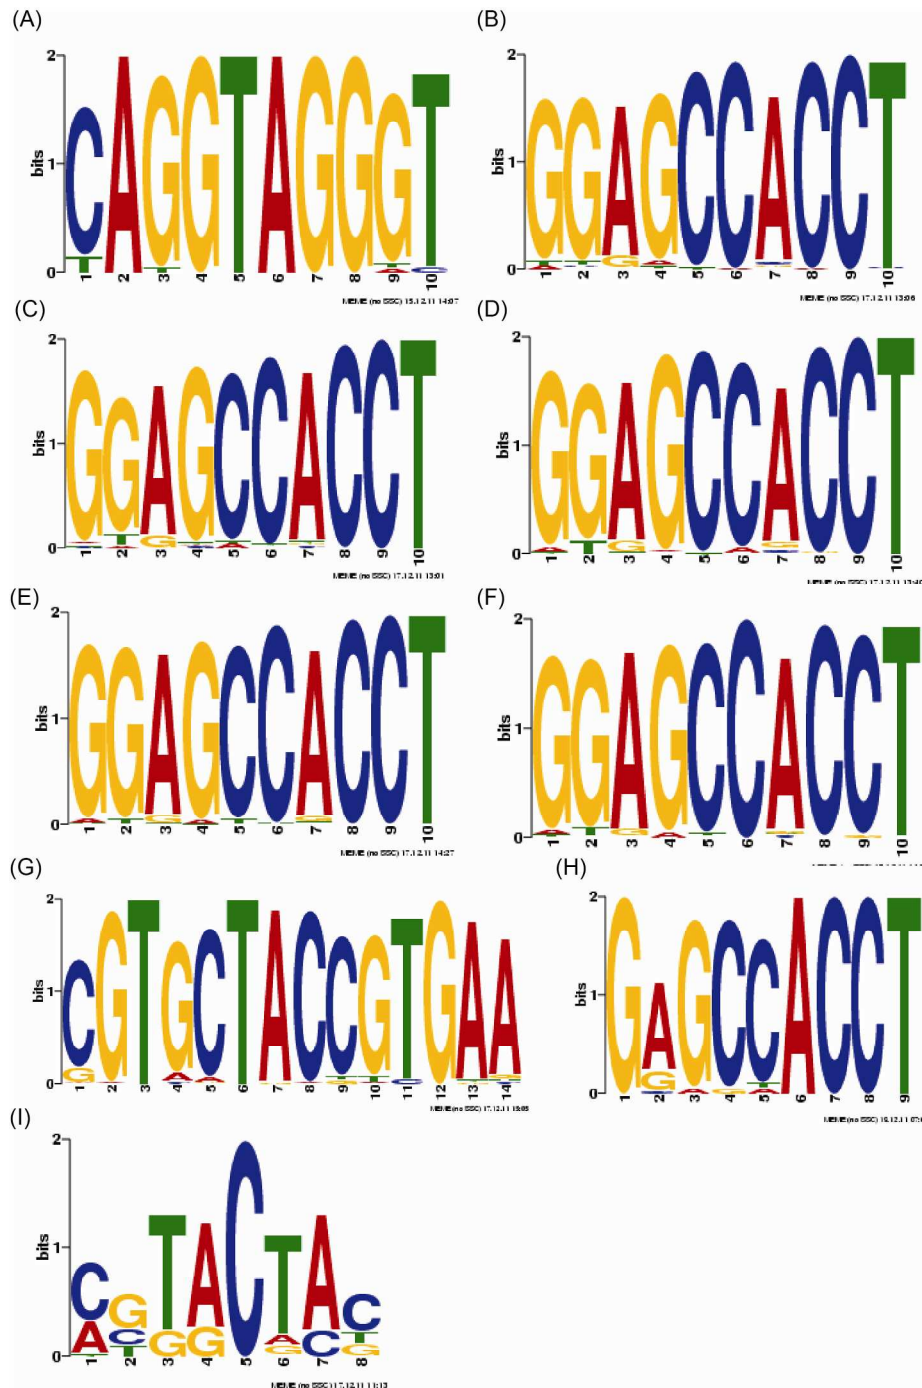

**Figure S1.** Motifs of the short byproducts discovered at the peak lengths. (A), motif found in pool 1, (B) motif found in pool 2, (C) motif found in pool 3, (D) motif found in pool 4, (E) motif found in pool 5, (F) motif found in pool 6, (G) motif found in pool 7 at the length of 54 nt, (H) motif found in pool 7 at the length of 46 nt, (I) motif found in control.

## [2] Gel Image of the PCR Products after Gel Extraction Purification

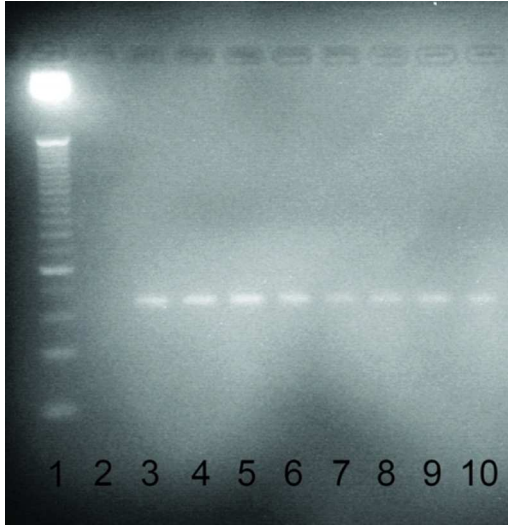

**Figure S2.** Gel image of 8 samples (lane 3 through lane 10) after gel extraction to remove undesired short products. Lane 1 was the 25 bp DNA ladder which indicated the size of DNA products. Lane 3 through lane 10 corresponded to the products of initial library and round 1 through round 7 after gel electrophoresis purification. This gel image showed that there were no short products detectable below the desired product bands.

## [3] Top 100 Abundant Oligonucleotides Fragments from 5 nt through 15 nt in the Selected Pools

**Table S1. Top 100 Abundant Oligos**

| 5 nt Oligo | 6 nt Oligo | 7 nt Oligo | 8 nt Oligo | 9 nt Oligo | 10 nt Oligo | 11 nt Oligo | 12 nt Oligo | 13 nt Oligo | 14 nt ligo | 15 nt Oligo |
|------------|------------|------------|------------|------------|-------------|-------------|-------------|-------------|------------|-------------|
| TTTT       | GGA        | GGAG       | ATCTG      | GAAGC      | GCCCGC      | GAAGCC      | GAAGCCC     | GAAGCCCG    | GAAGCCCG   | GCCCGCTGT   |
| G          | GCC        | CCA        | GAG        | CCGC       | TGTG        | CGCTG       | GCTGT       | CTGTG       | CTGTGA     | GACATC      |
| TTTG       | TTTG       | TGGA       | TCTGG      | AGCCC      | AGCCCG      | AGCCCG      | AAGCCCG     | CTGTGACA    | AGCCCGCT   | GAAGCCCGC   |
| T          | TT         | GCC        | AGC        | GCTG       | CTGT        | CTGTG       | CTGTG       | TCTGG       | GTGACA     | TGTGAC      |
| GTTT       | TTTT       | TCTG       | TGTGA      | GGAGC      | AAGCCC      | AAGCCC      | AGCCCGC     | AGCCCGCT    | GCCCGCTGT  | CGCTGTGAC   |
| T          | GT         | GAG        | CAT        | CGGT       | GCTG        | GCTGT       | TGTGA       | GTGAC       | GACAT      | ATCTGG      |
| GGTT       | TTTT       | ATCT       | GGTTC      | TGGAG      | CTGGAG      | CTGGAG      | GCCCGCT     | GCCCGCTG    | GCTGTGAC   | AGCCCGCTG   |
| T          | TG         | GGA        | CCG        | CCGG       | CCGG        | CCGGT       | GTGAC       | TGACA       | ATCTGG     | TGACAT      |
| TTGT       | GTTT       | GTGA       | ACATC      | GCCCG      | GAAGCC      | GCCCGCT     | TCTGGAG     | AAGCCCGC    | AAGCCCGC   | CCGCTGTGA   |
| T          | TT         | CAT        | TGG        | CTGT       | CGCT        | GTGA        | CCGGT       | TGTGA       | TGTGAC     | CATCTG      |
| TGTT       | TTTT       | GCCG       | GGAG       | CCCGCT     | TGGAGC      | TCTGGA      | TGTGACA     | CCGCTGTG    | CTGGAGCC   | TCTGGAGCC   |
| T          | GG         | GTT        | CCGG       | GTG        | CGGT        | GCCGG       | TCTGG       | ACATC       | GGTTCC     | GGTTCC      |
| TTTG       | TTGT       | CATC       | CATCT      | ATCTG      | TCTGGA      | GTGACAT     | GACATCT     | CATCTGGA    | CTGTGACAT  | CTGGAGCCG   |
| G          | TT         | TGC        | GGA        | GAGC       | GCCG        | CTGG        | GGAGC       | GCCGG       | CTGGA      | GTTCC       |
| ATTT       | TTTG       | TGTG       | CGCTG      | GGTTC      | CATCTG      | CCCGCTG     | CTGTGAC     | ATCTGGAG    | CCCGCTGTG  | AAGCCCGCT   |
| T          | GT         | ACA        | TGA        | CCGG       | GAGC        | TGAC        | ATCTG       | CCGGT       | ACATC      | GTGACA      |
| TTTT       | GGTT       | GCTG       | CTGGA      | TCTGG      | CCCGCT      | GTTCCCG     | GGTTCC      | GCTGTGAC    | CGCTGTGA   | CTGTGACAT   |
| A          | TT         | TGA        | GCC        | AGCC       | GTGA        | GAGC        | GGAGC       | ATCTG       | CATCTG     | CTGGAG      |
| TTGG       | TTAT       | CGCT       | GAGCC      | CTGGA      | GGAAGC      | CCGCTGT     | ATCTGGA     | GTGACATC    | GTGACATCT  | GGAGCCGGT   |
| T          | TT         | GTG        | GGT        | GCCG       | GACA        | GCCGG       | TGGAG       | GCCGG       | TGGAG      | TCCCG       |
| TATT       | TGTT       | GGAG       | TGGA       | GACAT      | CTGTGA      | CCGGTTC     | CCCGCTG     | CCCGCTGT    | CCCGCTGTG  | TGTGACATC   |
| T          | TT         | CCG        | GCCG       | CTGG       | CATC        | CCGG        | TGACA       | GACAT       | ACATCT     | TGGAGC      |
| TTAT       | ATTT       | GGTT       | CTGTG      | CCGCT      | CCGCTG      | GACATCT     | CTGGAGC     | TGGAGCCG    | CCGGTTC    | CCCGCTGTG   |
| T          | TT         | CCC        | ACA        | GTGA       | TGAC        | GGAG        | CGGTT       | GTTCC       | GGAGC      | ACATCT      |

|      |      |       |       |        |        |         |         |          |           |           |
|------|------|-------|-------|--------|--------|---------|---------|----------|-----------|-----------|
| TTTA | GGGT | CTGT  | GAAG  | AAGCC  | TGACAT | ACATCTG | CGTGTG  | TGACATCT | CATCTGGA  | GCTGTGACA |
| T    | TT   | GAC   | CCCG  | CGCT   | CTGG   | GAGC    | ACATC   | GGAGC    | GCCGGT    | TCTGGA    |
| TGGT | TTTT | CTGG  | GTGAC | CGGT   | CGCTGT | CATCTGG | CCGCTGT | TCTGGAGC | TGGAGCCG  | GCCGGTTCC |
| T    | TA   | AGC   | ATC   | CCCG   | GACA   | AGCC    | GACAT   | CGGT     | GTTCCC    | CGGAGC    |
| GGGT | TATT | AGCC  | CCGCT | CATCTG | ATCTGG | CTGTGAC | GAAAGCC | GGAGCCG  | GAAAGCCC  | TGGAGCCGG |
| T    | TT   | GGT   | GTG   | GAG    | AGCC   | ATCT    | CGCTG   | GTTCCC   | GCTGTG    | TTCCCG    |
| GTAT | TTGG | GGAA  | CGGA  | CGCTG  | GTGACA | TGTGACA | GGAGCCG | CGGTTCCC | GGAGCCGG  | GACATCTGG |
| T    | TT   | GCC   | GCCA  | TGAC   | TCTG   | TCTG    | GTTCC   | GGAGC    | TTCCCG    | AGCCGG    |
| TTGG | TTTA | CCGG  | GCCCG | CTGTG  | CGGTT  | ATCTGGA | GTGACAT | GAAAGCCC | GAGCCGGT  | GTGACATCT |
| G    | TT   | TTC   | CTG   | ACAT   | CCGG   | CTGGA   | GAGC    | GCTGT    | TCCCG     | GGAGCC    |
| GTGT | GTTT | ACAT  | CGGT  | GGAAG  | GACATC | GCTGTG  | GCCGGT  | CTGGAGCC | TGTGACATC | ACATCTGGA |
| T    | TG   | CTG   | CCC   | CCCG   | TGGA   | ACATC   | CCCGG   | GGTTC    | TGGAG     | GCCGGT    |
| GTTT | GTTT | CGGT  | CCCGG | TGTGA  | GGTTCC | CGCTGT  | CATCTGG | CGCTGTGA | TCTGGAGC  | GAGCCGGTT |
| G    | GT   | TCC   | AGC   | CATC   | CGGA   | GACAT   | AGCCG   | CATCT    | CGGTT     | CCCGGA    |
| TTGT | TTTG | GTTT  | GTTCC | TCCCG  | GTTCCC | GGTCCC  | TGACATC | GACATCTG | GACATCTG  | TGACATCTG |
| G    | TG   | CCG   | CGG   | GAGC   | GGAG   | GAGC    | TGGAG   | GAGCC    | GAGCCG    | GAGCCG    |
| GTTT | TGGG | GAGC  | GCCG  | CCGGA  | CCGGT  | TGGAGC  | GCTGTGA | TGTGACAT | ACATCTGG  | GAAAGCCCG |
| A    | TT   | CGG   | GTTT  | GCCA   | CCCG   | CGGTT   | CATCT   | CTGGA    | AGCCGG    | CTGTGA    |
| GTTA | TTTT | GACA  | GCTGT | ACATCT | TTCCCG | GCCGGT  | ACATCTG | CCGTTCC  | GCCGGTCC  | CCGGTTCCC |
| T    | AT   | TCT   | GAC   | GGA    | GAGC   | TCCCG   | GAGCC   | CGGAG    | CGGAG     | GGAGCC    |
| TATG | TGGT | CCGG  | GGAA  | GCTGT  | GGAGCC | GGAAGC  | CCGGTTC | GAGCCGGT | TGACATCTG | CATCTGGAG |
| T    | TT   | AGC   | GCCC  | GACA   | GGT    | CCGA    | CCCG    | TCCCG    | GAGCC     | CCGGT     |
| TGTG | TTTG | TGAC  | CCGGT | GCCGG  | CCCGGA | TGACATC | TGGAGCC | ACATCTGG | ATCTGGAG  | AGCCGGTTC |
| T    | GG   | ATC   | TCC   | TTCC   | GCCA   | TGGA    | GGTTC   | AGCCG    | CCGGT     | CCGGAG    |
| TTTA | TTAT | TTCCC | GACAT | CCCGG  | ACATCT | GAGCCG  | CGGTTCC | GCCGGTTC | CGGTTCCC  | ATCTGGAGC |
| G    | GT   | GG    | CTG   | AGCC   | GGAG   | GTTCC   | CGGAG   | CCGGA    | GAGCC     | CGGTT     |
| ATTT | TTGG | CCGC  | CCGGA | CCGGT  | GCTGTG | GGAGCC  | GAGCCGG | AGCCGGT  | GGTCCC    | CGGTTCCC  |
| G    | GT   | TGT   | GCC   | TCCC   | ACAT   | GGTTC   | TTCCC   | CCCG     | GAGCC     | GAGCCA    |
| TTAT | TATT | CCCG  | AGCCG | GTGAC  | TGTGAC | CGGTTCC | GTTCCC  | GGTCCC   | AGCCGGT   | AGCACAGAG |
| G    | TG   | GAG   | GTT   | ATCT   | ATCT   | CGGA    | GAGCC   | GAGCC    | CCCGGA    | GTCAGA    |
| TATT | GTTA | CGGA  | CCCGC | GTTCCC | GCCGGT | AGCCGG  | AGCCGGT | GTTCCC   | CGTGCTACC | GCACAGAGG |
| G    | TT   | GCC   | TGT   | GGA    | TCCC   | TTCCC   | TCCC    | AGCCA    | GTGAA     | TCAGAT    |
| TGGG | GTAT | TACC  | AGCCC | TTCCCG | TCCCGG | TTCCCGG | TTCCCGG | GTGCTACC | GCACAGAG  | CAGCACAGA |
| T    | TT   | GTG   | GCT   | GAG    | AGCC   | AGCC    | AGCCA   | GTGAA    | GTCAGA    | GTCAGA    |
| TGTA | GTTT | TCCC  | TTCCC | TGACA  | AGCCGG | TCCCGGA | GTGCTAC | CGTGCTAC | AGCACAGA  | CACAGAGGT |
| T    | AT   | GGA   | GGA   | TCTG   | TTCC   | GCCA    | CGTGA   | CGTGA    | GGTCAG    | CAGATG    |
| GGTA | TTGT | GAAG  | TCCCG | GAGCC  | GAGCCG | GTGCTAC | TGCTACC | GCACAGA  | CACAGAGG  | ACAGAGGTC |
| T    | GT   | CCC   | GAG   | GGT    | GTTT   | CGTG    | GTGAA   | GGTCAG   | TCAGAT    | AGATGG    |
| TTAG | ATTT | AAGC  | TGACA | AGCCG  | CTACCG | TGCTACC | CGTGCTA | CACAGAG  | CAGCACAG  | TATGCGTGC |
| T    | TG   | CCG   | TCT   | GTTT   | TGAA   | GTTT    | CCGTG   | GTCAGA   | AGTCA     | TACCG     |
| GGTT | ATTT | TATG  | AAGCC | CTACC  | GTGCTA | GCTACCG | CACAGAG | CAGCACAG | ACAGAGGT  | CTATGCGTG |
| A    | GT   | CGT   | CGC   | GTGA   | CCGT   | TGAA    | GTCAG   | AGGTC    | CAGATG    | CTACCG    |
| GTTG | TGTT | GCCC  | TACCG | TACCGT | TGCTAC | CGTGCTA | AGCACAG | CAGAGGTC | CAGAGGTC  | ATGCGTGCT |
| T    | AT   | GCT   | TGA   | GAA    | CGTG   | CCGT    | AGGTC   | AGATG    | AGATGG    | ACCGTG    |
| TTAG | TTGT | ATGC  | CTACC | TGCTAC | GCTACC | GCACAG  | CAGCACA | AGCACAGA | TATGCGTGC | CCTATGCGT |
| G    | GG   | GTG   | GTG   | CGT    | GTGA   | AGGTC   | GAGTC   | GAGTC    | TACCG     | GCTACC    |
| ATTG | TTTT | CCCG  | ACCGT | GTGCT  | CGTGCT | CAGCAC  | ACAGAGG | ACAGAGGT | CTATGCGTG | TGCGTGCTA |
| T    | AG   | CTG   | GAA   | ACCG   | ACCG   | AGAGG   | TCAGA   | CAGAT    | CTACC     | CCGTGA    |
| TGTT | TATT | AGGT  | GCTAC | GCTAC  | CAGCAC | CAGAGG  | GCACAGA | AGAGGTCA | TGCGTGCTA | GCGTGCTAC |
| A    | GG   | CAG   | CGT   | CGTG   | AGAG   | TCAGA   | GGTCA   | GATGG    | CCGTG     | CGTGAA    |
| GATT | GTGT | CGTG  | GTGCT | CGTGC  | AGCACA | ACAGAG  | CAGAGGT | GCGTGCTA | ATGCGTGCT | ACCTATGCG |
| T    | TT   | CTA   | ACC   | TACC   | GAGG   | GTCAG   | CAGAT   | CCGTG    | ACCGT     | TGCTAC    |
| TAGG | TAGG | GTGC  | TGCTA | AGAGG  | GCACAG | GAGGTC  | AGAGGTC | CTATGCGT | CCTATGCGT | CACCTATGC |
| T    | GT   | TAC   | CCG   | TCAG   | AGGT   | AGATG   | AGATG   | GCTAC    | GCTAC     | GTGCTA    |
| TTGT | GTTT | ACCG  | CGTGC | GCACA  | CAGAGG | AGCACA  | GAGGTCA | TATGCGTG | GCGTGCTA  | GCAGCACAG |
| A    | TA   | TGA   | TAC   | GAGG   | TCAG   | GAGGT   | GATGG   | CTACC    | CCGTGA    | AGGTCA    |
| ATTG | TATG | TCAG  | AGGTC | AGCAC  | CACAGA | AGAGGT  | TATGCGT | ATGCGTGC | ACCTATGCG | AGCAGCACA |
| G    | TT   | ATG   | AGA   | AGAG   | GGTC   | CAGAT   | GCTAC   | TACCG    | TGCTA     | GAGGTC    |
| ATGT | TGTT | GTCA  | GAGG  | ACAGA  | GAGGTC | CACAGA  | GCGTGCT | TGCGTGCT | CACCTATGC | GCCACCTAT |
| T    | TG   | GAT   | TCAG  | GGTC   | AGAT   | GGTCA   | ACCGT   | ACCGT    | GTGCT     | GCGTGC    |
| TAGT | TTAT | AGCC  | GTCAG | GGTCA  | AGAGGT | AGGTCA  | CCTATGC | CCTATGCG | GCAGCACA  | CCACCTATG |
| T    | TG   | CGC   | ATG   | GATG   | CAGA   | GATGG   | GTGCT   | TGCTA    | GAGGTC    | CGTGCT    |
| AGTT | TGTG | CAGA  | ACAGA | GAGGT  | AGGTCA | CCTATGC | CTATGCG | ACCTATGC | AGCAGCAC  | AGCCACCTA |
| T    | TT   | TGG   | GGT   | CAGA   | GATG   | GTGC    | TGCTA   | GTGCT    | AGAGGT    | TGCGTG    |

|      |      |       |       |        |        |         |          |          |           |           |
|------|------|-------|-------|--------|--------|---------|----------|----------|-----------|-----------|
| TGTT | TGTA | CTAC  | TATGC | AGGTC  | ACAGAG | CTATGCG | ATGCGTG  | CACCTATG | CCACCTATG | GAGCCACCT |
| G    | TT   | CGT   | GTG   | AGAT   | GTCA   | TGCT    | CTACC    | CGTGC    | CGTGC     | ATGCGT    |
| GTAT | GTTT | GGTC  | AGAG  | CACAG  | GGTCAG | ATGCGT  | TGCGTGC  | GCAGCACA | GCCACCTAT | CAGAGGTCA |
| G    | GG   | AGA   | GTC   | AGGT   | ATGG   | GCTAC   | TACCG    | GAGGT    | GCGTG     | GATGGG    |
| TATG | TTTA | CCGT  | GCACA | CAGAG  | CTATGC | GCGTGC  | ACCTATG  | AGCAGCAC | AGCCACCTA | CGTGCTACC |
| G    | GG   | GAA   | GAG   | GTCA   | GTGC   | TACCG   | CGTGC    | AGAGG    | TGCGT     | GTGAAG    |
| GGTG | GATT | AGAG  | GGTCA | CAGCA  | CCTATG | TATGCGT | CACCTAT  | CCACCTAT | GAGCCACC  | GTGCTACCG |
| T    | TT   | GTC   | GAT   | CAGA   | CGTG   | GCTA    | GCGTG    | GCGTG    | TATGCG    | TGAAGC    |
| GGGT | GAGC | CAGA  | CAGA  | GTCA   | TATGCG | TGCGTG  | GCAGCAC  | GCCACCTA | AGAGGTCA  | AGAGGTGAG |
| A    | CA   | GGT   | GGTC  | ATGG   | TGCT   | CTACC   | AGAGG    | TGCGT    | GATGGG    | ATGGGA    |
| ATTA | TTAG | GAGG  | TCAGA | CTATGC | ATGCGT | ACCTATG | AGCAGCA  | AGCCACCT | GTGCTACC  | GAGGTGAGA |
| T    | GT   | TCA   | TGG   | GTG    | GCTA   | CGTG    | CAGAG    | ATGCG    | GTGAAG    | TGGGAG    |
| GTTA | TTTA | ACAG  | AGCAC | TATGC  | GCGTGC | CACCTAT | GCCACCT  | GAGCCACC | GAGGTGAG  | CTACCGTGA |
| G    | TG   | AGG   | AGA   | GTGC   | TACC   | GCGT    | ATGCG    | TATGC    | ATGGGA    | AGCAGC    |
| TGTG | TTTA | TTTT  | CAGCA | ATGCG  | TGCGTG | GCAGCA  | CCACCTAT | GAGGTCA  | TGCTACCGT | TACCGTGAA |
| G    | GT   | GT    | CAG   | TGCT   | CTAC   | CAGCA   | GCGT     | GATGGG   | GAAGC     | GCAGCA    |
| AGG  | TTTG | TGCT  | CACAG | CCTATG | ACCTAT | AGCAGC  | AGCCACC  | TGCTACCG | TACCGTGA  | GCTACCGTG |
| GT   | TA   | ACC   | AGG   | CGT    | GCGT   | ACAGA   | TATGC    | TGAAG    | AGCAGC    | AAGCAG    |
| GTTG | GTTG | GCTA  | CTATG | GCGTG  | CACCTA | CCACCTA | GAGCCAC  | AGGTGAGA | CTACCGTGA | TGCTACCGT |
| G    | TT   | CCG   | CGT   | CTAC   | TGCG   | TGCG    | CTATG    | TGGGA    | AGCAG     | GAAGCA    |
| AGGT | GGTT | GTTA  | ATGCG | TGCGT  | GCAGCA | GCCACCT | AGGTGAG  | GCTACCGT | GCTACCGT  | AGGTGAGAT |
| T    | TG   | TTT   | TGC   | GCTA   | CAGA   | ATGC    | ATGGG    | GAAGC    | GAAGCA    | GGGAGC    |
| TATA | TGTT | AGAT  | CCTAT | ACCTAT | AGCAGC | AGCCACC | GCTACCG  | CCGTGAAG | ACCGTGAA  | ACCGTGAA  |
| T    | TA   | GGG   | GCG   | GCG    | ACAG   | TATG    | TGAAG    | CAGCA    | GCAGCA    | CAGCAC    |
| TGGT | GGTT | GGTT  | GCGTG | CACCTA | GCCACC | GAGCCA  | CTACCGT  | CTACCGTG | AGGTGAGA  | GGTCAGATG |
| A    | TA   | TTT   | CTA   | TGC    | TATG   | CCTAT   | GAAGC    | AAGCA    | TGGGAG    | GGAGCC    |
| TAGG | ATGT | TTTT  | TGCGT | GCAGC  | CCACCT | GGTCAG  | GGTCAGA  | ACCGTGAA | GGTCAGAT  | AAGCAGCAC |
| G    | TT   | GTT   | GCT   | ACAG   | ATGC   | ATGGG   | TGGGA    | GCAGC    | GCAGC     | AGAGGT    |
| GGG  | GGTT | GTAG  | ACCTA | AGCAG  | AGCCAC | CTACCGT | CCGTGAA  | TACCGTGA | AAGCAGCA  | CCGTGAAGC |
| GT   | AT   | GGT   | TGC   | CACA   | CTAT   | GAAG    | GCAGC    | AGCAG    | CAGAGG    | AGCACA    |
| GGAT | ATTT | TGGG  | CACCT | GCCAC  | GAGCCA | TACCGTG | TACCGTG  | GGTCAGAT | CCGTGAAG  | GAAGCAGCA |
| T    | TA   | TTT   | ATG   | CTAT   | CCTA   | AAGC    | AAGCA    | GGGAG    | CAGCAC    | CAGAGG    |
| TATT | AGTT | TTTG  | GCAGC | CCACCT | GTGAGA | GTCAGAT | ACCGTGA  | GTGAGATG | GTGAAGCA  | CGTGAAGCA |
| A    | TT   | TTT   | ACA   | ATG    | TGGG   | GGGA    | AGCAG    | GGAGC    | GCACAG    | GCACAG    |
| TTAT | TAGG | GGTA  | AGCA  | AGCCA  | TACCGT | GTGAAG  | CGTGAAG  | AAGCAGCA | GTCAGATG  | GTGAAGCAG |
| A    | TT   | GGG   | GCAC  | CCTA   | GAAG   | CAGCA   | CAGCA    | CAGAG    | GGAGCC    | CACAGA    |
| TGAT | ATTG | TGCG  | GCCAC | TCAGA  | TCAGAT | CCGTGA  | GTCAGAT  | CGTGAAGC | GAAGCAGC  | TGAAGCAGC |
| T    | GT   | TGC   | CTA   | TGGG   | GGGA   | AGCAG   | GGGAG    | AGCAC    | ACAGAG    | ACAGAG    |
| TTGG | TTGT | TTGG  | CAGAT | GAGCC  | ACCGTG | ACCGTG  | TCAGATG  | TGAAGCAG | CGTGAAGC  | GGAGCCACC |
| A    | AT   | GTT   | GGG   | ACCT   | AAGC   | AAGCA   | GGAGC    | CACAG    | AGCACA    | TATGCC    |
| ATAT | TTGT | CTAT  | CCACC | ACCGT  | CAGATG | CGTGAA  | CAGATGG  | GTGAAGCA | TGAAGCAG  | GTCAGATGG |
| T    | TG   | GCG   | TAT   | GAAG   | GGAG   | GCAGC   | GAGCC    | GCACA    | CACAGA    | GAGCCA    |
| TTTA | GTAT | GCAC  | AGCCA | CAGAT  | GTGAAG | TCAGATG | GAAGCAG  | TCAGATGG | GGAGCCAC  | AGAGGTGAG |
| A    | TG   | AGA   | CCT   | GGGA   | CAGC   | GGAG    | CACAG    | GAGCC    | CTATGC    | ATGGAG    |
| GGTT | GGGT | TTTG  | AGATG | CCGTG  | CCGTGA | CAGATG  | GTGAAGC  | GAAGCAG  | TCAGATGG  | CAGAGGTCA |
| G    | AT   | GTT   | GGG   | AAGC   | AGCA   | AGAGC   | AGCAC    | CACAGA   | GAGCCA    | GATGGA    |
| TTTG | ATTT | TTTT  | GGTA  | AGATG  | TGAAGC | AAGCAG  | AAGCAGC  | CAGATGG  | GAGGTGAG  | GAGGTGAGA |
| A    | GG   | TG    | GGGT  | GGAG   | AGCA   | CACAG   | ACAGA    | GAGCCA   | ATGGAG    | TGGAGC    |
| TGGG | GGTA | TTTT  | GAGCC | TGAAG  | CGTGAA | AGATGG  | TGAAGCA  | GGAGCCAC | AGAGGTCA  | AGGTGAGAT |
| G    | TT   | GTG   | ACC   | CAGC   | GCAG   | GAGCC   | GCACA    | CTATG    | GATGGA    | GGAGCC    |
| ATGG | TTTT | GCGT  | AGGTA | GAAGC  | AGATGG | TGAAGC  | GGAGCCA  | AGGTGAGA | AGGTGAGA  | TATTGGACA |
| T    | GA   | GCT   | GGG   | AGCA   | GAGC   | AGCAC   | CCTAT    | TGGAG    | TGGAGC    | CCTTCC    |
| GTGG | GGAT | TTTT  | GATG  | GTGAA  | GATGGG | GAAGCA  | AGATGGG  | GAGGTCA  | GGTCAGAT  | CGATTGTGG |
| T    | TT   | GGT   | GGAG  | GCAG   | AGCC   | GCACA   | AGCCA    | GATGGA   | GGAGCC    | GGACGT    |
| AATT | GTAT | TGTT  | CCGTG | CGTGA  | GAAGCA | GATGGG  | GGTCAGA  | GGTCAGAT | GATTGTGG  | GATTGTGGG |
| T    | GT   | ATT   | AAG   | AGCA   | GCAC   | AGCCA   | TGGAG    | GGAGC    | GGACGT    | GACGTA    |
| TTAA | TATT | TTTT  | ATGG  | GATGG  | AAGCAG | GGAGCC  | GTCAGAT  | GTCAGATG | ATTGGACA  | GGTCAGATG |
| T    | GT   | GGG   | GAGC  | GAGC   | CACA   | ACCTA   | GGAGC    | GAGCC    | CCTTCC    | GAGCCA    |
| ATTT | TAGT | GTTT  | TGAAG | AGGTA  | ATGGGA | GTCAGAT | AGGTGAG  | CGATTGTG | CCGATTGTG | GACGTATTG |
| A    | TT   | TTT   | CAG   | GGGT   | GCCA   | GGAG    | ATGGA    | GGGAC    | GGGAC     | GACACC    |
| GTGT | TTAG | ATTTT | GAAG  | TGGGA  | GGAGCC | GGTCAG  | TCAGATG  | TTGGACAC | GTCAGATG  | CCGATTGTG |
| A    | TT   | TT    | CAGC  | GCCA   | ACCT   | ATGGA   | GAGCC    | CTTCC    | GAGCCA    | GGGACG    |
| GTAG | TATT | GTTT  | GTGAA | ATGGG  | CAGGTA | TCAGATG | TGGACAC  | TATTGGAC | TATTGGACA | CGATTGGGA |
| T    | AT   | TTG   | GCA   | AGCC   | GGGT   | GAGC    | CTTCC    | ACCTT    | CCTTC     | CACCTT    |

|      |      |       |       |        |        |         |          |          |           |            |
|------|------|-------|-------|--------|--------|---------|----------|----------|-----------|------------|
| TAAT | TTGG | TATTT | AAGCA | CAGGT  | TCAGAT | CAGATG  | GGACACC  | CGTATTGG | ATTGTGGG  | ACGTATTGG  |
| T    | TG   | TT    | GCA   | AGGG   | GGAG   | GAGCC   | TTCCC    | ACACC    | GACGTA    | ACACCT     |
| ATGG | TTAT | AGCA  | CGTGA | AAGCA  | GTCAGA | GGACAC  | GATTGTG  | GATTGTGG | GGGACGTA  | GGACGTATT  |
| G    | GG   | CAG   | AGC   | GCAC   | TGGA   | CTTCC   | GGGAC    | GGACG    | TTGGAC    | GGACAC     |
| TGTG | TTGT | TTTTT | CAGGT | GGAGC  | CAGATG | GTGGGG  | TTGGACA  | ATTGTGGG | CGATTGTG  | GGGACGTAT  |
| A    | TA   | GG    | AGG   | CACC   | GAGC   | ACGTA   | CCTTC    | GACGT    | GGGACG    | TGGACA     |
| GTGT | GTTG | TGTT  | GGAG  | TTGTG  | AGATGG | TCCGATT | TTGTGGG  | TTGTGGGG | ACGTATTG  | GTGGGGACC  |
| G    | GT   | TTT   | CCAC  | GGGA   | AGCC   | GTGG    | GACGT    | ACGTA    | GACACC    | TATTGG     |
| GTAA | GTTT | TGGT  | GGGA  | TCAGA  | GTGGG  | TGGACA  | GGGACGT  | ATCCGATT | GACGTATT  | GTATTGGAC  |
| T    | AG   | TTT   | GCCA  | TGGA   | GACGT  | CCTTC   | ATTGG    | GTGGG    | GGACAC    | ACCTTC     |
| TTGA | AATT | GTTT  | TGGG  | GATTG  | GACACC | GACACCT | CGATTGT  | CCGATTGT | CGTATTGG  | GGGACGTA   |
| T    | TT   | GTT   | AGCC  | TGGG   | TTCC   | TCCC    | GGGGA    | GGGGA    | ACACCT    | TTGGAC     |
| TGGT | TTAG | CACA  | TTGTG | ACGTA  | GGACAC | CCGATTG | GGGGACG  | GGGACGT  | GTGGGGAC  | GATATCCGA  |
| G    | GG   | GAG   | GGG   | TTGG   | CTTC   | TGGG    | TATTG    | ATTGGA   | GTATTG    | TTGTGG     |
| GTAT | TATG | AGGT  | TGTTA | AGATG  | CGATTG | GGGACG  | GTGGGGGA | ATTGGACA | GTATTGGA  | TCCGATTGT  |
| A    | GT   | AGG   | TTT   | GAGC   | TGGG   | TATTG   | CGTAT    | CCTTC    | CACCTT    | GGGGAC     |
| GTAG | ATTG | TTTG  | GATTG | CAGAT  | GATTGT | ATTGTG  | TCCGATT  | TGGACACC | GGACGTAT  | TGGGGACGT  |
| G    | TT   | TGT   | TGG   | GGAG   | GGGG   | GGGAC   | GTGGG    | TTCCC    | TGGACA    | ATTGGA     |
| TGGA | TTTT | TTGT  | ATTGT | ATTGT  | CCGATT | GATTGT  | CAGATGG  | GAGGATAT | TTGTGGGG  | ATTGTGGGG  |
| T    | AA   | TTT   | GGG   | GGGG   | GTGG   | GGGGA   | AGCCA    | CCGAT    | ACGTAT    | ACGTAT     |
| GTGG | TTGG | TTGT  | GTATT | CGATT  | TGGACA | ATCCGAT | ATCCGAT  | GGACGTAT | GGGGACGT  | GGATATCCG  |
| G    | TA   | GGG   | GGA   | GTGG   | CCTT   | TGTG    | TGTGG    | TGGAC    | ATTGGA    | ATTGTG     |
| TGGG | AGGT | CCTA  | TGTGG | CGTATT | ACGTAT | CGATTGT | TATTGGA  | TCAGATGG | TGGGGACG  | GAGGATATC  |
| A    | TT   | TGC   | GGA   | GGA    | TGGA   | GGGG    | CACCT    | AGCCA    | TATTGG    | CGATTG     |
| TAGT | TGGT | TTGG  | TTGGG | GGGGA  | ATTGTG | TTGGACA | TGTGGGG  | GTGGGGGA | GATATCCG  | ATATCCGATT |
| A    | TA   | TTT   | TTT   | CGTA   | GGGA   | CCTT    | ACGTA    | CGTATT   | ATTGTG    | GTGGG      |
| AGTG | GTTA | GTGT  | ACGTA | ATCCG  | TCCGAT | GACGTAT | ATTGGAC  | GGGGACG  | ATATCCGAT | ATCCGATTG  |
| T    | GT   | TTT   | TTG   | ATTG   | TGTG   | TGGA    | ACCTT    | TATTGG   | TGTGG     | TGGGA      |
| TGGA | TCTG | GGGT  | CGTAT | TGGGG  | GGGGA  | GAGGAT  | CCGATTG  | ACGTATTG | TATCCGATT | TGTGGGGAC  |
| G    | GA   | TTT   | TGG   | ACGT   | CGTAT  | ATCCG   | TGGGG    | GACAC    | GTGGG     | GTATTG     |
| ATGT | ATTT | ATTT  | GGGG  | GGACA  | GGGAC  | GGGGAC  | GACGTAT  | GACGTATT | TTGGACACC | AGGATATCC  |
| G    | AT   | GTT   | ACGT  | CCTT   | GTATT  | GTATT   | TGGAC    | GGACA    | TTCCC     | GATTGT     |
| GATT | ATAT | TTTG  | AGATG | GACAC  | TGGGGA | TGGGGA  | ATTGTGG  | GTATTGGA | TCCGATTGT | TTGTGGGGGA |
| G    | TT   | GGT   | GAG   | CTTC   | CGTA   | CGTAT   | GGACG    | CACCT    | GGGGA     | CGTATT     |
| ATAT | TGTT | TTTG  | GGGA  | GGGAC  | GACGTA | TATTGGA | CGTATTG  | TGGGGAC  | GAGGATAT  | ATTGGACAC  |
| G    | GT   | TTG   | CGTA  | GTAT   | TTGG   | CACC    | GACAC    | GTATTG   | CCGATT    | CTTCCC     |
| ATGT | ATCT | ATTTT | TATTG | GACGT  | TTGTGG | TGTGGG  | GTATTGG  | TATCCGAT | GGATATCC  | TATCCGATT  |
| A    | GG   | GT    | GAC   | ATTG   | GGAC   | GACGT   | ACACC    | TGTGG    | GATTGT    | GTGGGG     |
| TATA | AGG  | GTAT  | GGAC  | GTGGG  | ACACCT | ACGTATT | GAGGATA  | GGACACCT | ATCCGATTG | CGTGCTACC  |
| G    | GTT  | TGG   | GTAT  | GACG   | TCCC   | GGAC    | TCCGA    | TCCC     | TGGG      | GTGAAA     |
| GGTA | GTTA | TTTTA | CGATT | ACACCT | ATCCGA | GGACGT  | GGACGTA  | TGTGGGG  | AGGATATC  | TTGGACACC  |
| A    | TG   | TT    | GTG   | TCC    | TTGT   | ATTGG   | TTGGA    | ACGTAT   | CGATTG    | TTCCCG     |
| GGG  | GATT | TTATT | GAGG  | CCGATT | GGACGT | AGATGG  | AGGATAT  | TCCGATTG | TGTGGGGGA | CGAGGATAT  |
| AT   | GT   | TT    | ATAT  | GTG    | ATTG   | AGCCA   | CCGAT    | TGGGG    | CGTATT    | CCGATT     |
| TGTA | GGGT | TTTTT | TTTTT | GATGG  | GAGGAT | ATTGGAC | GACACCT  | GATATCCG | TGGACACCT | GTGCTACCG  |
| G    | TA   | AT    | GTG   | AGCC   | ATCC   | ACCT    | TCCC     | ATTGT    | TCCC      | TGAAAC     |
| GGTT | ATGG | GTAT  | TGTTT | GTATT  | CGTATT | TTGTGG  | ACGTATT  | ATATCCGA | GTGCTACC  | TGCTACCGT  |
| C    | TT   | TTT   | GTT   | GGAC   | GGAC   | GGACG   | GGACA    | TTGTG    | GTGAAA    | GAACA      |

#### [4] Motifs Found in Contigs

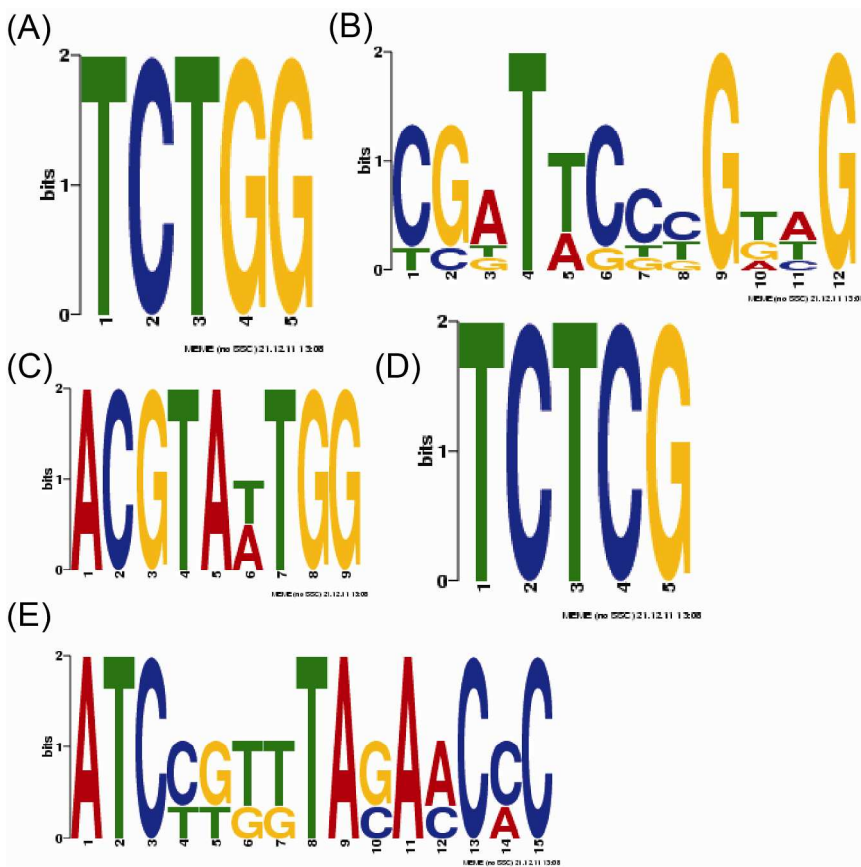

**Figure S4.** Motifs found in contigs. (A) Motif 1 was highlighted in pink in Table 3. (B) Motif 2 was highlighted in yellow in Table 3. (C) Motif 3 was highlighted in light blue in Table 3. (D) Motif 4 was highlighted in dark blue in Table 3. (E) Motif 5 was highlighted in green in Table 3.
